# Supplementary material for: An embryonic stem cell-specific heterochromatin state promotes core histone exchange in the absence of DNA accessibility
Source: PubMed Central journal article supplement (PMC7547087; doi:10.1038/s41467-020-18863-1), 2020-10-09
Supplement: 41467_2020_18863_MOESM3_ESM.pdf [file 41467_2020_18863_MOESM3_ESM.pdf]

## **Description of Additional Supplementary Files**

File Name: Supplementary Data 1

Description: A list of published datasets and accession numbers used in this study.
